# Supplementary material
Source: publisher site journal article supplement (https://www.dovepress.com/article/100533)
Supplement: Supplementary file 1 [file get_supplementary_file.php]

## **SUPPLEMENTARY DATA**

### **Tables**

**Supplementary Table S1:** Descriptive analysis: characteristics of patients categorised according to severity of COPD (GOLD stage), cases and controls

**Supplementary Table S2:** Descriptive analysis: characteristics of patients categorised according to severity of COPD (medication-based staging), cases and controls

### **Supplementary material**

**Appendix:** Data management: using medication history to stage disease severity

**Corresponding author:** Ann D Morgan, NHLI, Imperial College London, London, UK

**E-mail:** a.morgan15@imperial.ac.uk

**Supplementary Table S1:** Descriptive analysis: characteristics of patients categorised according to severity of COPD (GOLD stage), cases and controls

| Characteristic                         | CASES           |              |              |              |              | CONTROLS <sup>a</sup> |              |              |              |              |
|----------------------------------------|-----------------|--------------|--------------|--------------|--------------|-----------------------|--------------|--------------|--------------|--------------|
|                                        | No. of subjects | GOLD stage   |              |              |              | No. of subjects       | GOLD stage   |              |              |              |
|                                        |                 | 1<br>No. (%) | 2<br>No. (%) | 3<br>No. (%) | 4<br>No. (%) |                       | 1<br>No. (%) | 2<br>No. (%) | 3<br>No. (%) | 4<br>No. (%) |
| <b>Exacerbators</b>                    | 3,051           | 448 (14.7)   | 1,584 (51.9) | 853 (28.0)   | 166 (5.4)    | 9,440                 | 1,542 (16.3) | 4,690 (49.7) | 2,547 (27.0) | 661 (7.0)    |
| Infrequent                             | 2,124           | 331 (15.6)   | 1,115 (52.5) | 575 (27.1)   | 103 (4.9)    | 6,715                 | 1,148 (17.1) | 3,376 (50.3) | 1,748 (26.0) | 443 (6.6)    |
| Frequent                               | 927             | 117 (12.6)   | 469 (50.6)   | 278 (30.0)   | 63 (6.8)     | 2,725                 | 394 (14.5)   | 1,314 (48.2) | 799 (29.3)   | 218 (7.0)    |
| <b>Gender</b>                          | 3,051           | 448 (14.7)   | 1,584 (51.9) | 853 (28.0)   | 166 (5.4)    | 9,440                 | 1,542 (16.3) | 4,690 (49.7) | 2,547 (27.0) | 661 (7.0)    |
| Men                                    | 1,623           | 202 (12.5)   | 846 (52.1)   | 454 (28.0)   | 121 (7.5)    | 4,974                 | 686 (13.8)   | 2,424 (48.7) | 1,440 (29.0) | 424 (8.5)    |
| Women                                  | 1,428           | 246 (17.2)   | 738 (51.7)   | 399 (27.9)   | 45 (3.2)     | 4,466                 | 856 (19.2)   | 2,266 (50.7) | 1,107 (24.8) | 237 (5.3)    |
| <b>Index age (years)</b>               | 3,051           | 448 (14.7)   | 1,584 (51.9) | 853 (28.0)   | 166 (5.4)    | 9,440                 | 1,542 (16.3) | 4,690 (49.7) | 2,547 (27.0) | 661 (7.0)    |
| Under 60                               | 229             | 34 (14.9)    | 127 (55.5)   | 55 (24.0)    | 13 (5.9)     | 719                   | 156 (21.7)   | 339 (47.2)   | 176 (24.5)   | 48 (6.7)     |
| 60–69                                  | 781             | 127 (16.3)   | 401 (51.3)   | 205 (26.3)   | 48 (6.2)     | 2,422                 | 411 (17.0)   | 1,214 (50.2) | 602 (24.9)   | 195 (8.1)    |
| 70–79                                  | 1,221           | 160 (13.1)   | 655 (53.6)   | 336 (27.5)   | 70 (5.7)     | 3,815                 | 575 (15.1)   | 1,874 (49.1) | 1,097 (28.8) | 269 (7.1)    |
| 80 and over                            | 820             | 127 (15.5)   | 401 (48.9)   | 257 (31.3)   | 35 (4.3)     | 2,484                 | 400 (16.1)   | 1,263 (50.9) | 672 (27.1)   | 149 (6.0)    |
| <b>Smoking status<sup>b</sup></b>      | 3,051           | 448 (14.7)   | 1,584 (51.9) | 853 (28.0)   | 166 (5.4)    | 9,440                 | 1,542 (16.3) | 4,690 (49.7) | 2,547 (27.0) | 661 (7.0)    |
| Non-smoker                             | 276             | 5 (19.6)     | 150 (54.4)   | 61 (22.1)    | 11 (4.0)     | 854                   | 197 (23.1)   | 417 (48.8)   | 187 (21.9)   | 53 (6.2)     |
| Ex-smoker                              | 1,421           | 204 (14.4)   | 730 (51.4)   | 413 (29.1)   | 74 (5.2)     | 4,315                 | 660 (15.3)   | 2,093 (48.5) | 1,238 (28.7) | 324 (7.5)    |
| Current smoker                         | 1,354           | 190 (14.0)   | 704 (52.0)   | 379 (28.0)   | 81 (6.0)     | 4,271                 | 685 (16.0)   | 2,180 (51.0) | 1,122 (26.3) | 284 (6.7)    |
| <b>BMI<sup>b</sup></b>                 | 3,037           | 446 (14.7)   | 1,577 (51.9) | 848 (27.9)   | 166 (5.5)    | 9,404                 | 1,537 (16.3) | 4,676 (49.7) | 2,536 (27.0) | 655 (7.0)    |
| Underweight                            | 164             | 12 (7.3)     | 73 (44.5)    | 60 (36.6)    | 19 (11.6)    | 717                   | 59 (8.2)     | 278 (38.8)   | 269 (37.5)   | 111 (15.5)   |
| Normal weight                          | 955             | 107 (11.2)   | 463 (48.5)   | 313 (32.8)   | 72 (7.5)     | 3,445                 | 484 (14.1)   | 1,650 (47.9) | 1,016 (29.5) | 295 (8.6)    |
| Over weight                            | 986             | 158 (16.2)   | 523 (53.0)   | 254 (25.8)   | 51 (5.2)     | 3,078                 | 559 (18.2)   | 1,575 (51.2) | 779 (25.3)   | 165 (5.4)    |
| Obese                                  | 932             | 169 (18.3)   | 518 (55.6)   | 221 (23.7)   | 24 (2.6)     | 2,164                 | 435 (20.1)   | 1,173 (54.2) | 472 (21.8)   | 84 (3.9)     |
| <b>Family history</b>                  | 3,051           | 448 (14.7)   | 1,584 (51.9) | 853 (28.0)   | 166 (5.4)    | 9,440                 | 1,542 (16.3) | 4,690 (49.7) | 2,547 (27.0) | 661 (7.0)    |
| Yes                                    | 886             | 142 (16.0)   | 479 (54.1)   | 224 (25.3)   | 41 (4.6)     | 2,598                 | 467 (18.0)   | 1,386 (53.4) | 605 (23.3)   | 140 (5.4)    |
| <b>Hypertension</b>                    | 3,051           | 448 (14.7)   | 1,584 (51.9) | 853 (28.0)   | 166 (5.4)    | 9,440                 | 1,542 (16.3) | 4,690 (49.7) | 2,547 (27.0) | 661 (7.0)    |
| Yes                                    | 1,573           | 236 (15.0)   | 832 (52.9)   | 445 (28.3)   | 60 (3.8)     | 4,713                 | 785 (16.7)   | 2,428 (51.5) | 1,239 (26.3) | 261 (5.5)    |
| <b>Dyslipidaemia</b>                   | 3,051           | 448 (14.7)   | 1,584 (51.9) | 853 (28.0)   | 166 (5.4)    | 9,440                 | 1,542 (16.3) | 4,690 (49.7) | 2,547 (27.0) | 661 (7.0)    |
| Yes                                    | 637             | 111 (17.4)   | 359 (56.4)   | 150 (23.6)   | 17 (2.7)     | 2,019                 | 384 (19.0)   | 1,061 (52.6) | 466 (23.1)   | 108 (5.4)    |
| <b>Diabetes</b>                        | 3,051           | 448 (14.7)   | 1,584 (51.9) | 853 (28.0)   | 166 (5.4)    | 9,440                 | 1,542 (16.3) | 4,690 (49.7) | 2,547 (27.0) | 661 (7.0)    |
| Yes                                    | 517             | 70 (13.5)    | 277 (53.6)   | 146 (28.2)   | 24 (4.6)     | 1,575                 | 253 (16.1)   | 823 (52.3)   | 414 (26.3)   | 85 (5.4)     |
| <b>Atrial fibrillation<sup>b</sup></b> | 3,051           | 448 (14.7)   | 1,584 (51.9) | 853 (28.0)   | 166 (5.4)    | 9,440                 | 1,542 (16.3) | 4,690 (49.7) | 2,547 (27.0) | 661 (7.0)    |
| Yes                                    | 390             | 41 (10.5)    | 224 (57.4)   | 107 (27.4)   | 18 (4.6)     | 1,000                 | 147 (14.7)   | 485 (48.5)   | 293 (29.3)   | 75 (7.5)     |
| <b>Heart failure<sup>b</sup></b>       | 3,051           | 448 (14.7)   | 1,584 (51.9) | 853 (28.0)   | 166 (5.4)    | 9,438                 | 1,542 (16.3) | 4,688 (49.7) | 2,547 (27.0) | 661 (7.0)    |
| Yes                                    | 420             | 39 (9.3)     | 208 (49.5)   | 142 (33.8)   | 31 (7.4)     | 929                   | 116 (12.5)   | 446 (48.0)   | 281 (30.3)   | 86 (9.3)     |
| <b>CVDs</b>                            | 3,051           | 448 (14.7)   | 1,584 (51.9) | 853 (28.0)   | 166 (5.4)    | 9,440                 | 1,542 (16.3) | 4,690 (49.7) | 2,547 (27.0) | 661 (7.0)    |
| no CVD                                 | 2,185           | 318 (14.6)   | 1,095 (50.1) | 644 (29.5)   | 128 (5.9)    | 6,956                 | 1,133 (16.3) | 3,443 (49.5) | 1,872 (26.9) | 508 (7.3)    |
| 1 CVD                                  | 597             | 94 (15.8)    | 333 (55.8)   | 142 (23.8)   | 28 (4.7)     | 1,779                 | 302 (17.0)   | 873 (49.1)   | 493 (27.7)   | 111 (6.2)    |
| 2 or more CVDs                         | 269             | 36 (13.4)    | 156 (58.0)   | 67 (23.8)    | 10 (3.7)     | 705                   | 107 (15.2)   | 374 (53.1)   | 182 (25.8)   | 42 (6.0)     |

a Including duplicates.

b Some missing data.

**Abbreviations:** BMI, Body mass index; COPD, chronic obstructive pulmonary disease; CVD, cardiovascular disease; GOLD, Global Initiative for Chronic Obstructive Lung Disease

**Supplementary Table S2:** Descriptive analysis: characteristics of patients categorised according to severity of COPD (medication-based staging), cases and controls

| Characteristic                         | CASES           |                  |              |              |              | CONTROLS <sup>a</sup> |                  |              |              |              |
|----------------------------------------|-----------------|------------------|--------------|--------------|--------------|-----------------------|------------------|--------------|--------------|--------------|
|                                        | No. of subjects | Disease severity |              |              |              | No. of subjects       | Disease severity |              |              |              |
|                                        |                 | 1<br>No. (%)     | 2<br>No. (%) | 3<br>No. (%) | 4<br>No. (%) |                       | 1<br>No. (%)     | 2<br>No. (%) | 3<br>No. (%) | 4<br>No. (%) |
| <b>Exacerbators</b>                    | 3,590           | 842 (23.5)       | 591 (16.5)   | 1,402 (39.1) | 755 (21.0)   | 10,774                | 2,853 (26.5)     | 2,056 (19.1) | 4,154 (38.6) | 1,711(15.9)  |
| Infrequent                             | 2,545           | 642 (25.2)       | 411 (16.2)   | 1,013(39.8)  | 479 (18.8)   | 7,757                 | 2,220 (28.6)     | 1,469 (18.9) | 2,991 (38.6) | 1,077(13.9)  |
| Frequent                               | 1,045           | 200 (19.1)       | 180 (17.2)   | 389 (37.2)   | 276 (26.4)   | 3,017                 | 633 (21.0)       | 567 (19.5)   | 1,163 (38.5) | 634 (21.0)   |
| <b>Gender</b>                          | 3,590           | 842 (23.5)       | 591 (16.5)   | 1,402(39.1)  | 755(21.0)    | 10,774                | 2,853 (26.5)     | 2,056 (19.1) | 4,154 (38.6) | 1,711(15.9)  |
| Men                                    | 1,868           | 414 (22.2)       | 326 (17.5)   | 713 (38.2)   | 415 (22.2)   | 5,608                 | 1,517 (27.1)     | 1,112 (19.8) | 2,114 (37.0) | 865 (15..5)  |
| Women                                  | 1,722           | 428 (24.9)       | 265 (15.4)   | 689 (40.0)   | 340 (19.7)   | 5,166                 | 1,336 (25.9)     | 944 (18.3)   | 2,040 (39.5) | 846 (16..4)  |
| <b>Index age (years)</b>               | 3,590           | 842 (23.5)       | 591 (16.5)   | 1,402 (39.1) | 755 (21.0)   | 10,774                | 2,853 (26.5)     | 2,056 (19.1) | 4,154 (38.6) | 1,711(15.9)  |
| Under 60                               | 268             | 60 (22.4)        | 48 (17.9)    | 106 (39.6)   | 54 (20.2)    | 800                   | 213 (26.7)       | 126 (15.8)   | 355 (44.5)   | 106 (13.3)   |
| 60–69                                  | 875             | 191 (21.8)       | 142 (16.2)   | 345 (39.4)   | 197 (22.5)   | 2,642                 | 684 (19.0)       | 522 (19.2)   | 1,033 (39.1) | 403 (15.1)   |
| 70–79                                  | 1,417           | 340 (24.0)       | 230 (16.2)   | 552 (39.0)   | 295 (20.8)   | 4,279                 | 1,065 (24.9)     | 825(19.1)    | 1,617 (37.8) | 722(18.1)    |
| 80 and over                            | 1,030           | 251 (24.4)       | 171 (16.6)   | 399 (38.7)   | 209 (20.3)   | 3,053                 | 891 (29.1)       | 583 (19.1)   | 1,149 (37.6) | 430 (14.1)   |
| <b>Smoking status<sup>b</sup></b>      | 3,589           | 842 (23.5)       | 591 (16.5)   | 1,401(39.0)  | 755 (21.0)   | 10,765                | 2,691 (26.6)     | 1,908 (18.8) | 3,898 (38.6) | 1,614(16.0)  |
| Non-smoker                             | 368             | 111(30.2)        | 39 (10.6)    | 154 (41.9)   | 64 (17.4)    | 1,089                 | 320 (29.4)       | 164 (15.1)   | 442 (40.6)   | 163 (15.0)   |
| Ex-smoker                              | 1,632           | 349 (21.4)       | 296 (18.1)   | 614 (37.6)   | 373 (22.9)   | 4,828                 | 1,214 (25.3)     | 966 (20.0)   | 1,820 (37.7) | 828 (17.3)   |
| Current smoker                         | 1,589           | 382 (24.0)       | 256 (16.1)   | 633 (39.8)   | 318 (20.0)   | 4,848                 | 1,314(26.0)      | 925 (19.1)   | 1,889 (36.3) | 720 (14.8)   |
| <b>BMI<sup>b</sup></b>                 | 3,491           | 808 (23.2)       | 581 (16.6)   | 1,370 (39.2) | 732 (21.0)   | 10,519                | 2,763 (26.3)     | 2,020 (19.7) | 4,067 (38.0) | 1,669(15.9)  |
| Underweight                            | 192             | 48 (25.0)        | 30 (15.6)    | 72 (37.5)    | 42 (21.9)    | 825                   | 199 (24.1)       | 161 (18.8)   | 309 (37.5)   | 111 (18.9)   |
| Normal weight                          | 1,109           | 255 (23.0)       | 187 (16.9)   | 421(38.0)    | 246 (22.2)   | 3,908                 | 1,052 (26.9)     | 726 (17.9)   | 1,416 (39.5) | 645 (16.5)   |
| Overweight                             | 1,123           | 271 (24.1)       | 176 (15.7)   | 454 (40.4)   | 222 (19.8)   | 3,389                 | 902 (28.2)       | 656 (19.4)   | 1,345 (25.3) | 486 (5.4)    |
| Obese                                  | 1,067           | 234 (21.9)       | 188 (17.6)   | 423 (39.6)   | 222 (20.8)   | 2,397                 | 610 (25.1)       | 477 (19.2)   | 928 (38.7)   | 384 (15.9)   |
| <b>Family history</b>                  | 3,590           | 842 (23.5)       | 591 (16.5)   | 1,402(39.1)  | 755(21.0)    | 10,774                | 2,853 (26.5)     | 2,056 (19.1) | 4,154 (38.6) | 1,711(15.9)  |
| Yes                                    | 995             | 225 (22.5)       | 168 (16.9)   | 388 (40.1)   | 214 (21.5)   | 2,911                 | 766 (26.0)       | 563 (19.4)   | 1,106 (38.3) | 476 (16.4)   |
| <b>Hypertension</b>                    | 3,590           | 842 (23.5)       | 591 (16.5)   | 1,402(39.1)  | 755(21.0)    | 10,774                | 2,853 (26.5)     | 2,056 (19.1) | 4,154 (38.6) | 1,711(15.9)  |
| Yes                                    | 1,829           | 432 (23.6)       | 292 (16.0)   | 745 (40.7)   | 360 (19.7)   | 5,343                 | 1,452 (27.2)     | 1,014 (19.0) | 2,097 (39.3) | 780 (14.5)   |
| <b>Dyslipidaemia</b>                   | 3,590           | 842 (23.5)       | 591 (16.5)   | 1,402(39.1)  | 755 (21.0)   | 10,774                | 2,853 (26.5)     | 2,056 (19.1) | 4,154 (38.6) | 1,711(15.9)  |
| Yes                                    | 730             | 162 (22.5)       | 121 (16.8)   | 290 (40.3)   | 147 (20.4)   | 2,241                 | 603 (27.0)       | 438(19.6)    | 874 (37.1)   | 353 (15.4)   |
| <b>Diabetes</b>                        | 3,590           | 842 (23.5)       | 591 (16.5)   | 1,402(39.1)  | 755 (21.0)   | 10,774                | 2,853 (26.5)     | 2,056 (19.1) | 4,154 (38.6) | 1,711(15.9)  |
| Yes                                    | 596             | 135 (22.7)       | 105 (17.6)   | 221 (37.1)   | 135 (22.7)   | 1,785                 | 476 (26.1)       | 323 (18.3)   | 673 (37.3)   | 313 (17.4)   |
| <b>Atrial fibrillation<sup>b</sup></b> | 3,590           | 842 (23.5)       | 591 (16.5)   | 1,402(39.1)  | 755 (21.0)   | 10,774                | 2,852 (26.5)     | 2,056 (19.1) | 4,154 (38.6) | 1,711(15.9)  |
| Yes                                    | 464             | 101 (21.8)       | 75 (16.2)    | 177 (38.2)   | 111 (23.9)   | 1,187                 | 331 (27.7)       | 236 (19.5)   | 426 (35.3)   | 194 (16.5)   |
| <b>Heart failure<sup>b</sup></b>       | 3,590           | 842 (23.5)       | 591 (16.5)   | 1,402 (39.1) | 755(21.0)    | 10,772                | 2,852 (26.6)     | 2,056 (19.1) | 4,153 (38.6) | 1,711(15.9)  |
| Yes                                    | 535             | 126 (23.6)       | 81 (15.1)    | 197 (36.8)   | 131 (24.5)   | 1,130                 | 274 (24.9)       | 234 (20.0)   | 395 (34.3)   | 227 (20.1)   |
| <b>CVDs</b>                            | 3,590           | 842 (23.5)       | 591 (16.5)   | 1,402(39.1)  | 755 (21.0)   | 10,774                | 2,853 (26.5)     | 2,056 (19.1) | 4,154 (38.6) | 1,711(15.9)  |
| no CVD                                 | 2,555           | 602 (23.6)       | 421 (16.5)   | 1,018 (39.8) | 514 (20.1)   | 7,925                 | 2,084 (26.3)     | 1,482 (18.5) | 3,156 (39.9) | 1,203(15.3)  |
| 1 CVD                                  | 719             | 172 (23.9)       | 118 (16.4)   | 263 (36.6)   | 166 (23.1)   | 2,039                 | 546 (26.0)       | 413 (20.3)   | 723 (35.7)   | 357 (17.5)   |
| 2 or more CVDs                         | 316             | 68 (21.5)        | 52 (16.5)    | 121 (38.3)   | 75 (23.7)    | 810                   | 223 (27.2)       | 161 (19.1)   | 275 (33.8)   | 151 (18.6)   |

a Including duplicates.

b Some missing data.

**Abbreviations:** BMI, Body mass index; COPD, chronic obstructive pulmonary disease; CVD, cardiovascular disease; GOLD, Global Initiative for Chronic Obstructive Lung Disease

## APPENDIX: Data management: using medication history to stage disease severity

Given the availability of detailed records of medication history for the patients in the study population, the possibility of using these data to derive an alternative measure of disease severity was explored.

Medication histories were available for all 13,512 patients who make up the study cohort. Individual records provided information on the class of medication prescribed (“Original therapy group” in Table A1) and the corresponding date of prescription. Using the NICE COPD management guidelines<sup>1</sup>, the original therapy groupings were streamlined to reflect the broad classes of medications that would be prescribed to patients at a given stage of disease. For instance, short-acting medications (SABA and SAMA) are recommended for patients with mild COPD, and thus all medications of this type were assigned to therapy group 1 in the revised scheme. As patients progress to moderate disease, they will likely be prescribed long-acting medications (LABA and LAMA), which accordingly are assigned to therapy group 2 in the revised scheme (see Table A1).

**Table A1: COPD medications**

| Class of medication | Original therapy group | Revised therapy group | Frequency | Percentage |
|---------------------|------------------------|-----------------------|-----------|------------|
| SABA                | 1                      | 1                     | 12,738    | 22.3       |
| SAMA                | 2                      | 1                     | 4,732     | 8.3        |
| SABA + CROMO        | 3                      | 1                     | 13        | 0.02       |
| SABA + SAMA         | 8                      | 1                     | 1,808     | 3.2        |
| LABA                | 4                      | 2                     | 4,941     | 8.63       |
| LAMA                | 9                      | 2                     | 7,061     | 12.3       |
| LABA + ICS          | 5, 6                   | 3                     | 9,404     | 16.4       |
| ICS                 | 7                      | 3                     | 8,801     | 15.4       |
| OCS                 | 10                     | 4                     | 201       | 0.35       |
| CORTICO             | 11                     | NA                    | 0         | 0.0        |
| OXYGEN              | 12                     | 4                     | 688       | 1.20       |
| ROFLUMILAST         | 13                     | 4                     | 15        | 0.03       |
| THEOPHILLINE        | 14                     | 4                     | 2,512     | 4.4        |
| AZITHROMYCIN        | 15                     | 4                     | 863       | 1.5        |
| MUCOLYTICS          | 16                     | 4                     | 3,456     | 6.0        |

SABA, Short-acting beta<sub>2</sub> agonist

SAMA, short-acting muscarinic antagonist

SABA + CROMO, Short-acting beta<sub>2</sub> agonist plus sodium chromoglycate

LABA, Long-acting beta<sub>2</sub> agonist

LAMA, Long-acting muscarinic antagonist

ICS, Inhaled corticosteroid

ORS, oral corticosteroid

Using this revised grouping, it is our intention to code patients who are only ever prescribed group 1 medications as having “mild” disease. If however they are prescribed a group 2 medication at some

<sup>1</sup> NICE. *COPD: Management of Chronic Obstructive Pulmonary Disease in Adults in Primary and Secondary Care* [update]. London, UK: National Institute for Health and Clinical Excellence; 2010.

point in their medication history, they should be coded as having “moderate” disease. Likewise, patients taking any combination of group 1, 2 and/or 3 medications (but not a group 4 medication) should be described as having “severe” disease, and patients recorded as having been prescribed a group 4 medication should be accorded a “very severe” disease status.

Initial staging of patients according to their medication history did not take into account any records which had a prescription date more than 6 months after the patient’s index date<sup>2</sup>. The purpose of excluding subsequent prescriptions is to ensure that the staging of the patient’s disease status reflects their status as close to the time of their VTE event (or selection as a control) as possible. A “lag-time” of 6 months was factored in to take account of the fact that patients are likely to develop and experience worsening disease for a period of time before being prescribed a new medication to manage their symptoms. However, a sizeable proportion of patients were found to only have prescription records 6-months post their index date. In the interests of generating an as complete as possible medication-based staging dataset, the first record post the index date plus 6 months was used to stage patients who only had records 6-months post their index date.

Thus staging of patients according to their medication history followed the following order of preference of record selection:

1. For patients with one or more records within a given 18-month period (12 months prior to the index date plus 6 months post the index date), staging was based on the highest class of medication prescribed during that time interval;
2. For patients without relevant records within the above-mentioned time interval, staging was based on the class of medication prescribed at any point prior to the start of the 18-month interval (in the case of multiple pre-interval records, the record nearest to the start of the above-mentioned interval was selected);
3. For patients without relevant records neither within the above-mentioned time interval nor in the period prior to this interval, staging was based on the class of medication prescribed 6-months post their index date (in the case of multiple post-interval records, the first post-interval record was selected).

A total of 386 patients in the cohort were missing both a medication date and medication class. Since all patients in the cohort have a diagnosis of COPD, it was assumed that these patients had mild disease and were coded as such. A further 12 patients had only a single entry in the data set, with a medication date but no corresponding medication group. As no reasonable inference can be made regarding the disease status of this group of patients, they were coded as having missing data. Another 1046 patients had at least one medication record that was missing a medication class (but included a medication date): staging of these patients was based on their other medication records.

---

<sup>2</sup> For cases the index date is the date they experienced the outcome of interest; for controls the index date is the date of their selection.
